# Supplementary material for: Quantum interference across hybrid quantum nodes
Source: Research Square preprint supplement (doi:10.21203/rs.3.rs-8081229/v1), 2025-11-28
Supplement: Supplementary file 1 [file 28fdb895ab3e88bc4d3807ed.docx]

Supplementary Information for

**Quantum interference across hybrid quantum nodes**

Kyu-Young Kim1†, Heewoo Kim2†, Dong Hyun Park1, Jinhyuk Bae2, Gyeongmin Ju2, Suk In Park3, Jin Dong Song3, Je-Hyung Kim1,4‡ and Han Seb Moon2,4*

1Department of Physics, Ulsan National Institute of Science and Technology; Ulsan, 44919, Republic of Korea

2Department of Physics, Pusan National University; Busan, 46241, Republic of Korea

3Center for Opto-Electronic Materials and Devices Research, Korea Institute of Science and Technology; Seoul, 02792, Republic of Korea

4Quantum Sensors Research Center, Pusan National University; Busan, 46241, Republic of Korea

Corresponding authors. Email: ‡[jehyungkim@unist.ac.kr](mailto:jehyungkim@unist.ac.kr) and *[hsmoon@pusan.ac.kr](mailto:hsmoon@pusan.ac.kr)

**Supplementary Note 1. Photon statistics of signal photons from 133Cs with and without heralding process.**

Signal photons from 133Cs ensemble without heralding process using idler photons follow thermal distribution, which is . To confirm thermal property of the signal photons, we performed second-order measurement without any heralding process. Supplementary Figure 1a is experimental result fitted with an equation of the same form as Eq. (3) of the main text. The bunching profile of with a time scale of ps as a thermal light represents well-known thermal distribution of the signal photons.

To suppress uncorrelated background photon detection, we apply a narrow ps time window at the conditional second-order coincidence of the heralded signal photons () using the idler photons as heralding triggers. The heralding process effectively suppresses the probability of measuring uncorrelated signal photons and lowers the background level of uncorrelated signal photons (), which would otherwise exhibit thermal distribution in the absence of the heralding process. As a result, the amplitude of the bunching profile at zero-time delay increases to (Supplementary Figure 1b) with a time scale of ps when we fit the data using an equation same form of Eq. (3) of the main text.

However, because of a large difference between the enormous coincidence within the narrow time window near zero-time delay and a very low constant background level, this coincidence measurement cannot exhibit the single-photon nature of heralded single photons and instead shows the bunching phenomenon. To reveal the anti-bunching profile of heralded single photons, we have to normalize the coincidence measurement result properly to compensate for the large difference. So, we normalized the conditional second-order coincidence result using the signal-idler cross-correlation (Inset of Fig. 3a of the main text).


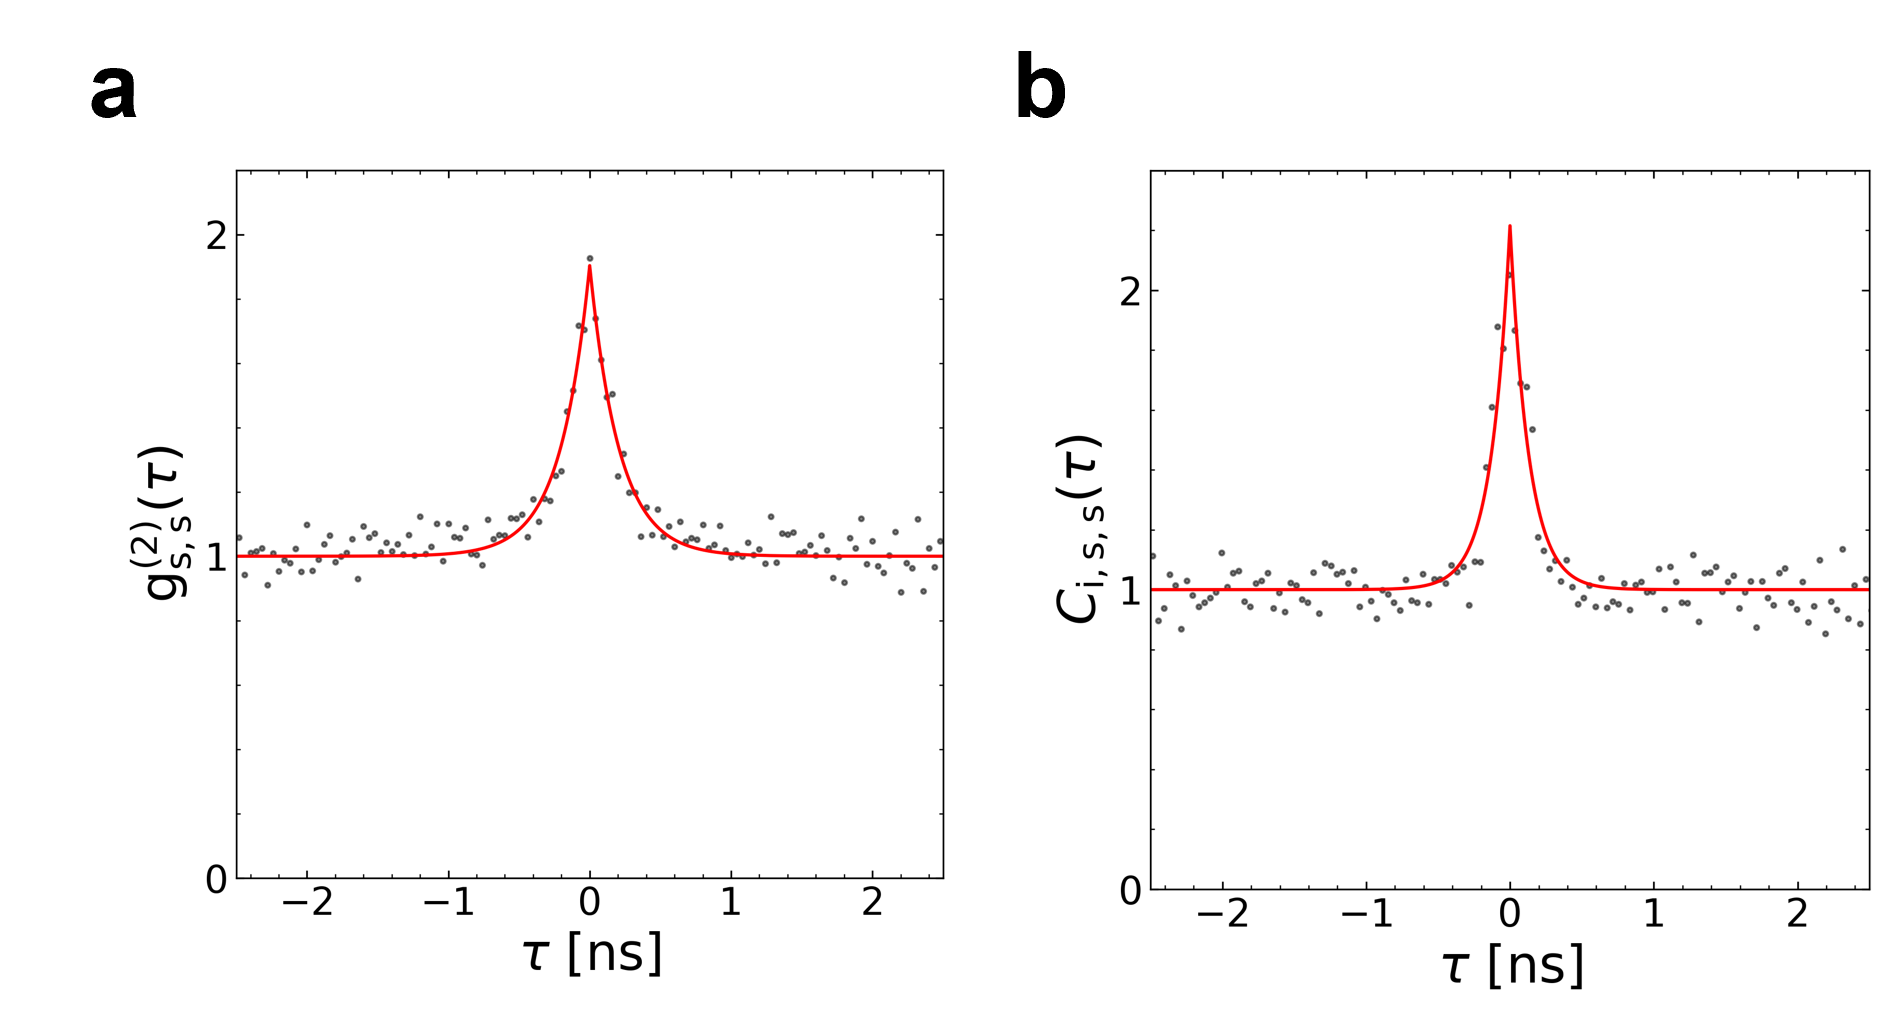


Supplementary Figure 1. Second-order correlation and conditional second-order coincidence measurement results of the signal photons without and with heralding process. a, Second-order correlation measurement result without heralding process of signal photons. Because of thermal distribution, . b, Conditional second-order coincidence measurement result with heralding process using idler photons.

**Supplementary Note 2. Theoretical model**

To analyze two-photon interference between single photons and heralded single-photons, we calculated the third-order correlations. The single photons emitted from the QD are described as a Fock state . In contrast, the quantum state of the heralded photon-pair generation from the warm 133Cs ensemble is

and

where and are annihilation operators of signal and idler photon modes, and is the degree of the squeezing. Under ideal condition of unitary system efficiency, including detection efficiencies of single photon detectors and transmission efficiencies of quantum channels, idler and signal photons are always co-existing and serve as single photons under heralding process, so-called heralded single photons.

Unfortunately, the real world is not ideal. The detection efficiencies of single photon detectors are less than , and there are always losses in quantum channels. The imperfect system degrades the intensities of quantum emitters, modifies quantum states of the quantum lights, and results in photons losing their pairs. To consider the lossy system, we adopt a beamsplitter approach. The lossy system can be expressed as a beamsplitter of which transmission efficiency is equal to the system efficiency. Then, the quantum states of photons after transmitting the beamsplitter is equivalent to the photons’ quantum states at the lossy system. Let the system efficiency of single photons from the QD and signal(idler) photons from warm Cs ensemble be and () which are less than . The unnormalized single photon state becomes

, and its intensity is . In contrast, the quantum state of the heralded photon-pair has multi-photon components. These multi-photon states are divided into several less-photon states with binomial distribution, like

Therefore, the unnormalized quantum state of the heralded photon-pair at the lossy system is

and their intensity becomes

and

where is the mean photon number of signal and idler photons. Therefore, count rate ratio between the signal and single photons is .

Compared to the previous two-photon interference between two single photons 1,2, the two-photon interference visibility between two photons with different statistics exhibits count rate ratio dependency. The single photons and the heralded signal photons meet at a 50:50 beamsplitter, and creation operators of and for input ports and and for output ports have relations that

Successive two-photon interferences occur only when the photons are indistinguishable, and the idler photons are heralded within the effective heralding time window. According to previous studies 3,4, analyzing conditional two-photon interference requires third-order correlation for two output ports of the beamsplitter at time and and idler photons at time , which is

where and are creation and annihilation operators for the idler photons. Using Supplementary Equation (8), the third order coincidence with output port operators at zero-time delay () is defined as

where is the degree of indistinguishability between the single and signal photons 5,6. Therefore, the two-photon interference visibility can be calculated through the following relation

Let’s assume that the single and signal photons enter the input port and , respectively. Since the two photons are independent before two-photon interference, the third order coincidence can be modified as

The nth-order moments of the single and signal photons are

where is the density matrix of the heralded photon-pair at the lossy system.

**Supplementary Note 3. Efficiencies of the systems**

In practice, system losses are significant and have the possibility to modify quantum states as we discussed above. Therefore, we separately evaluated efficiencies of the systems for QD and warm Cs ensemble. Supplementary Table 1 – 3 show optical components used in each system for the QD and warm Cs ensemble and their transmission efficiencies. As a result, the system efficiency for the single photons from the QD, , is , and the efficiency for the signal (idler) photons from the warm Cs ensemble, (), is (), respectively.

| **Optical components** | **Efficiency** |
| --- | --- |
| Objective lens (Mitutoyo / M Plan Apo NIR HR 100x) |  |
| Half wave plate (Thorlabs / AHWP05M-980) |  |
| Polarizing beamsplitter (Thorlabs / CCM1-PBS255/M) |  |
| Linear polarizer (Meadowlark Optics / UPM-050-Vis-AR2) |  |
| Mirror × 3 (Thorlabs / E03) |  |
| Half wave plate (Thorlabs / WPH05M-915) |  |
| Quarter wave plate (Thorlabs / WPQ05M-915) |  |
| Long pass edge filter (Thorlabs / FELH0900) |  |
| Objective lens (Newport / 5726-B-H) |  |
| Free space to fiber coupling |  |
| Grating-based fiber band pass filter (WL Photonics) |  |
| 90:10 fiber beamsplitter (Thorlabs) |  |
| SNSPD (Quantum Opus) |  |
| **Total** |  |

Supplementary Table. 1. Listed optical components used for the single photons from the QD and their transmission efficiencies.

| **Optical components** | **Efficiency** |
| --- | --- |
| Cell window |  |
| Linear polarizer (Meadowlark Optics / UPM-050-Vis-AR2) |  |
| Band pass filter (Thorlabs / FF01-920/10-25) |  |
| Fiber tip |  |
| Mirror × 2 (Thorlabs / E03) |  |
| Lens × 4 |  |
| SNSPD (Quantum Opus) |  |
| **Total** |  |

Supplementary Table. 2. Listed optical components used for the signal photons from the warm Cs ensemble and their transmission efficiencies.

| **Optical components** | **Efficiency** |
| --- | --- |
| Cell window |  |
| Linear polarizer (Newport / 05P109AR.16) |  |
| Band pass filter (Thorlabs / FF01-920/10-25) |  |
| Fiber tip |  |
| Mirror × 2 (Thorlabs / E03) |  |
| Lens × 4 |  |
| SNSPD (Quantum Opus) |  |
| **Total** |  |

Supplementary Table. 3. Listed optical components used for the signal photons from the warm Cs ensemble and their transmission efficiencies.

**References**

1 Kim, J.-H., Cai, T., Richardson, C. J. K., Leavitt, R. P. & Waks, E. Two-photon interference from a bright single-photon source at telecom wavelengths. *Optica* **3**, 577-584, doi:10.1364/OPTICA.3.000577 (2016).

2 Zhai, L. *et al.* Quantum interference of identical photons from remote GaAs quantum dots. *Nature Nanotechnology* **17**, 829-833, doi:10.1038/s41565-022-01131-2 (2022).

3 Höckel, D., Koch, L. & Benson, O. Direct measurement of heralded single-photon statistics from a parametric down-conversion source. *Physical Review A* **83**, 013802, doi:10.1103/PhysRevA.83.013802 (2011).

4 Lee, Y.-S., Lee, S. M., Kim, H. & Moon, H. S. Highly bright photon-pair generation in Doppler-broadened ladder-type atomic system. *Optics Express* **24**, 28083-28091, doi:10.1364/OE.24.028083 (2016).

5 Wiegner, R., von Zanthier, J. & Agarwal, G. S. Quantum interference and non-locality of independent photons from disparate sources. *Journal of Physics B: Atomic, Molecular and Optical Physics* **44**, 055501, doi:10.1088/0953-4075/44/5/055501 (2011).

6 Khodadad Kashi, A., Caspani, L. & Kues, M. Spectral Hong-Ou-Mandel Effect between a Heralded Single-Photon State and a Thermal Field: Multiphoton Contamination and the Nonclassicality Threshold. *Physical Review Letters* **131**, 233601, doi:10.1103/PhysRevLett.131.233601 (2023).
